# Supplementary material for: Repeated horizontal gene transfer of GALactose metabolism genes violates Dollo’s law of irreversible loss
Source: bioRxiv or medRxiv preprint supplement (doi:10.1101/2020.07.22.216101), 2020-07-24

# Supplemental Figure 1

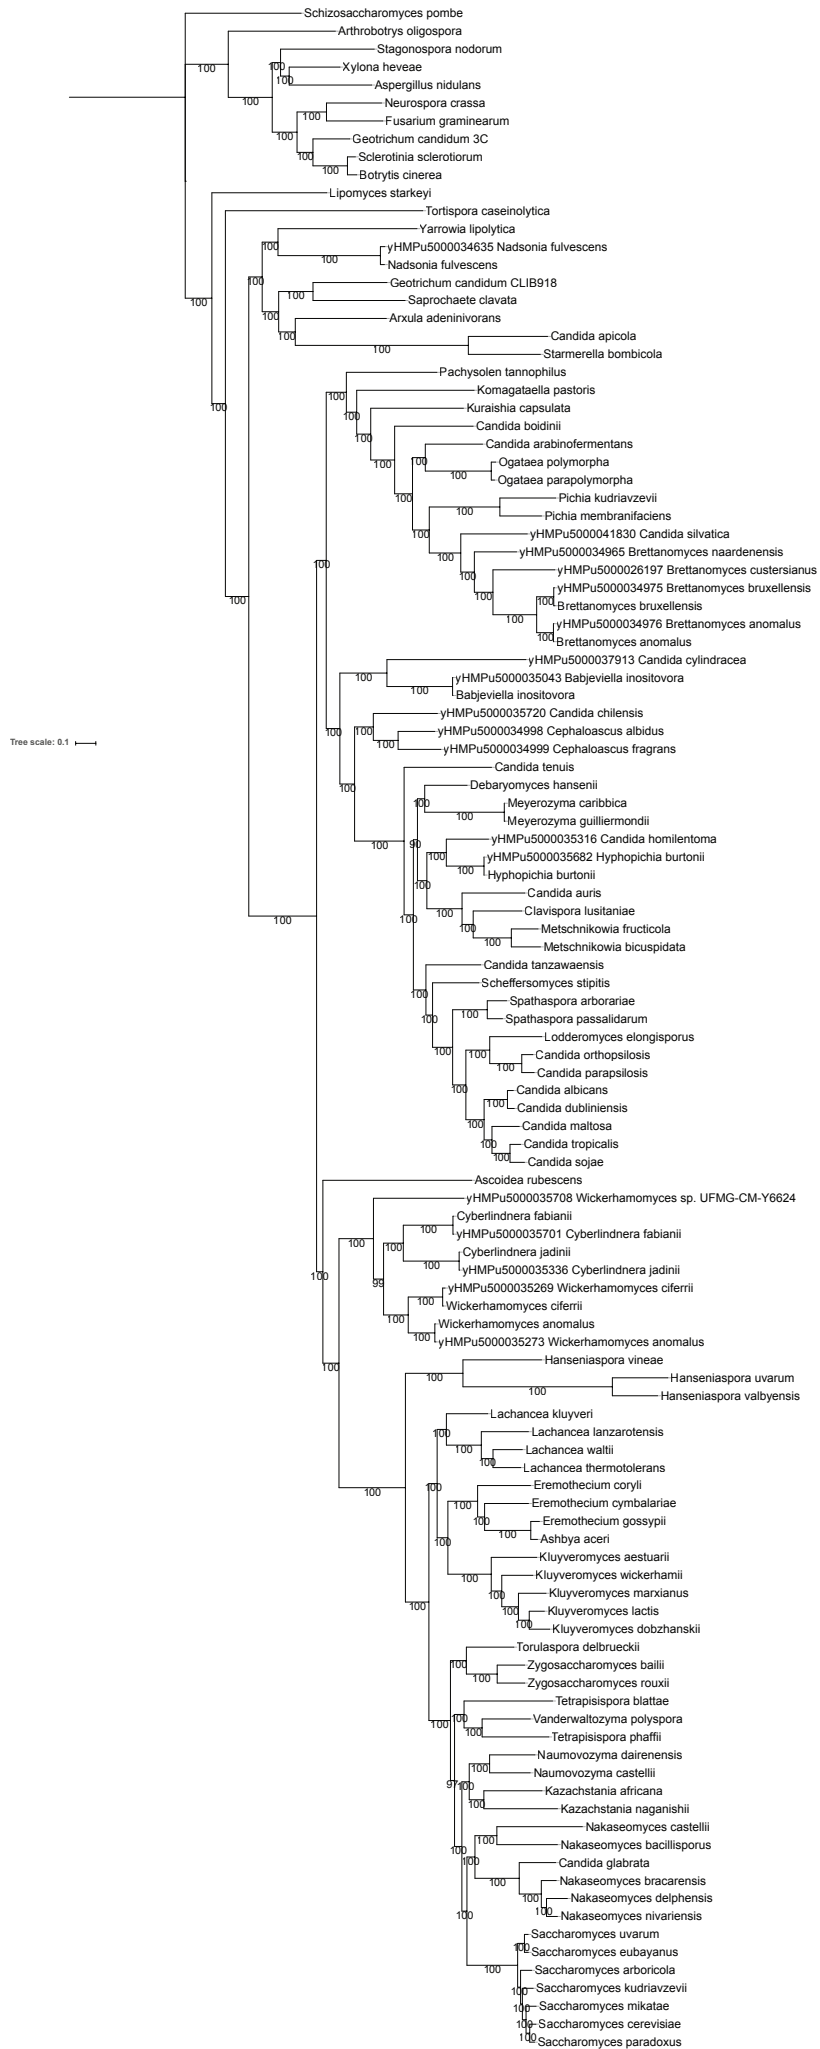

# Supplemental Figure 2

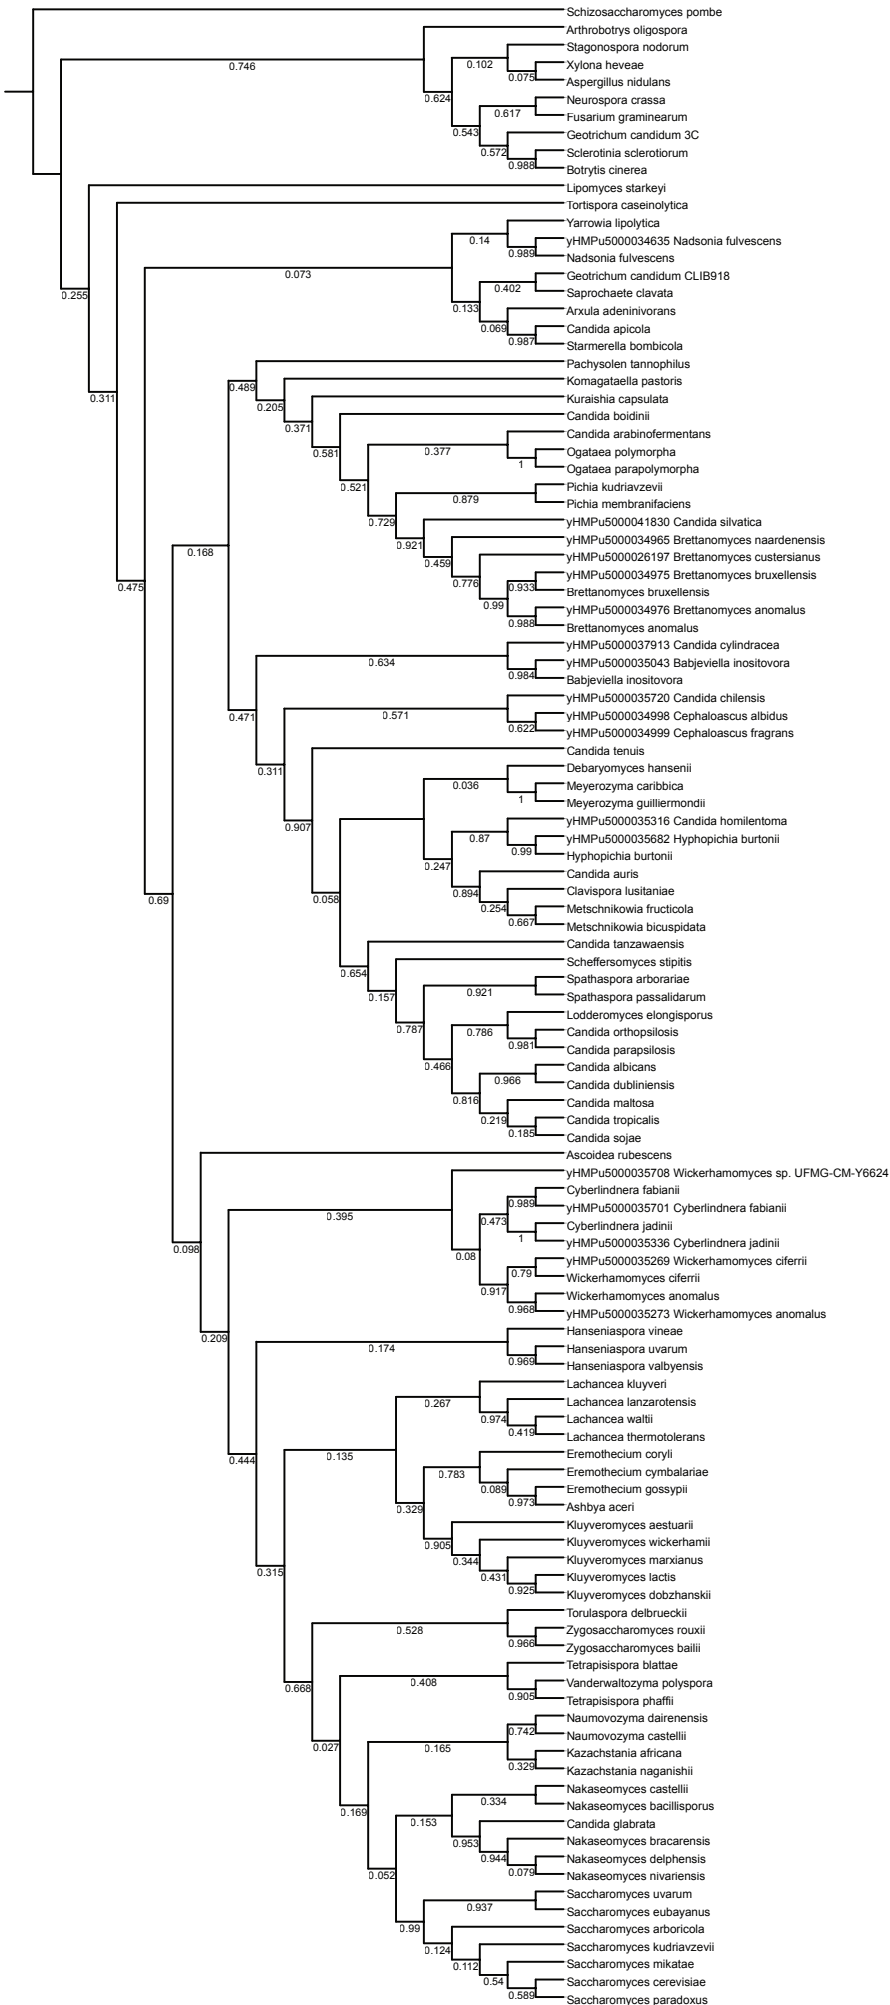

# Supplemental Figure 3

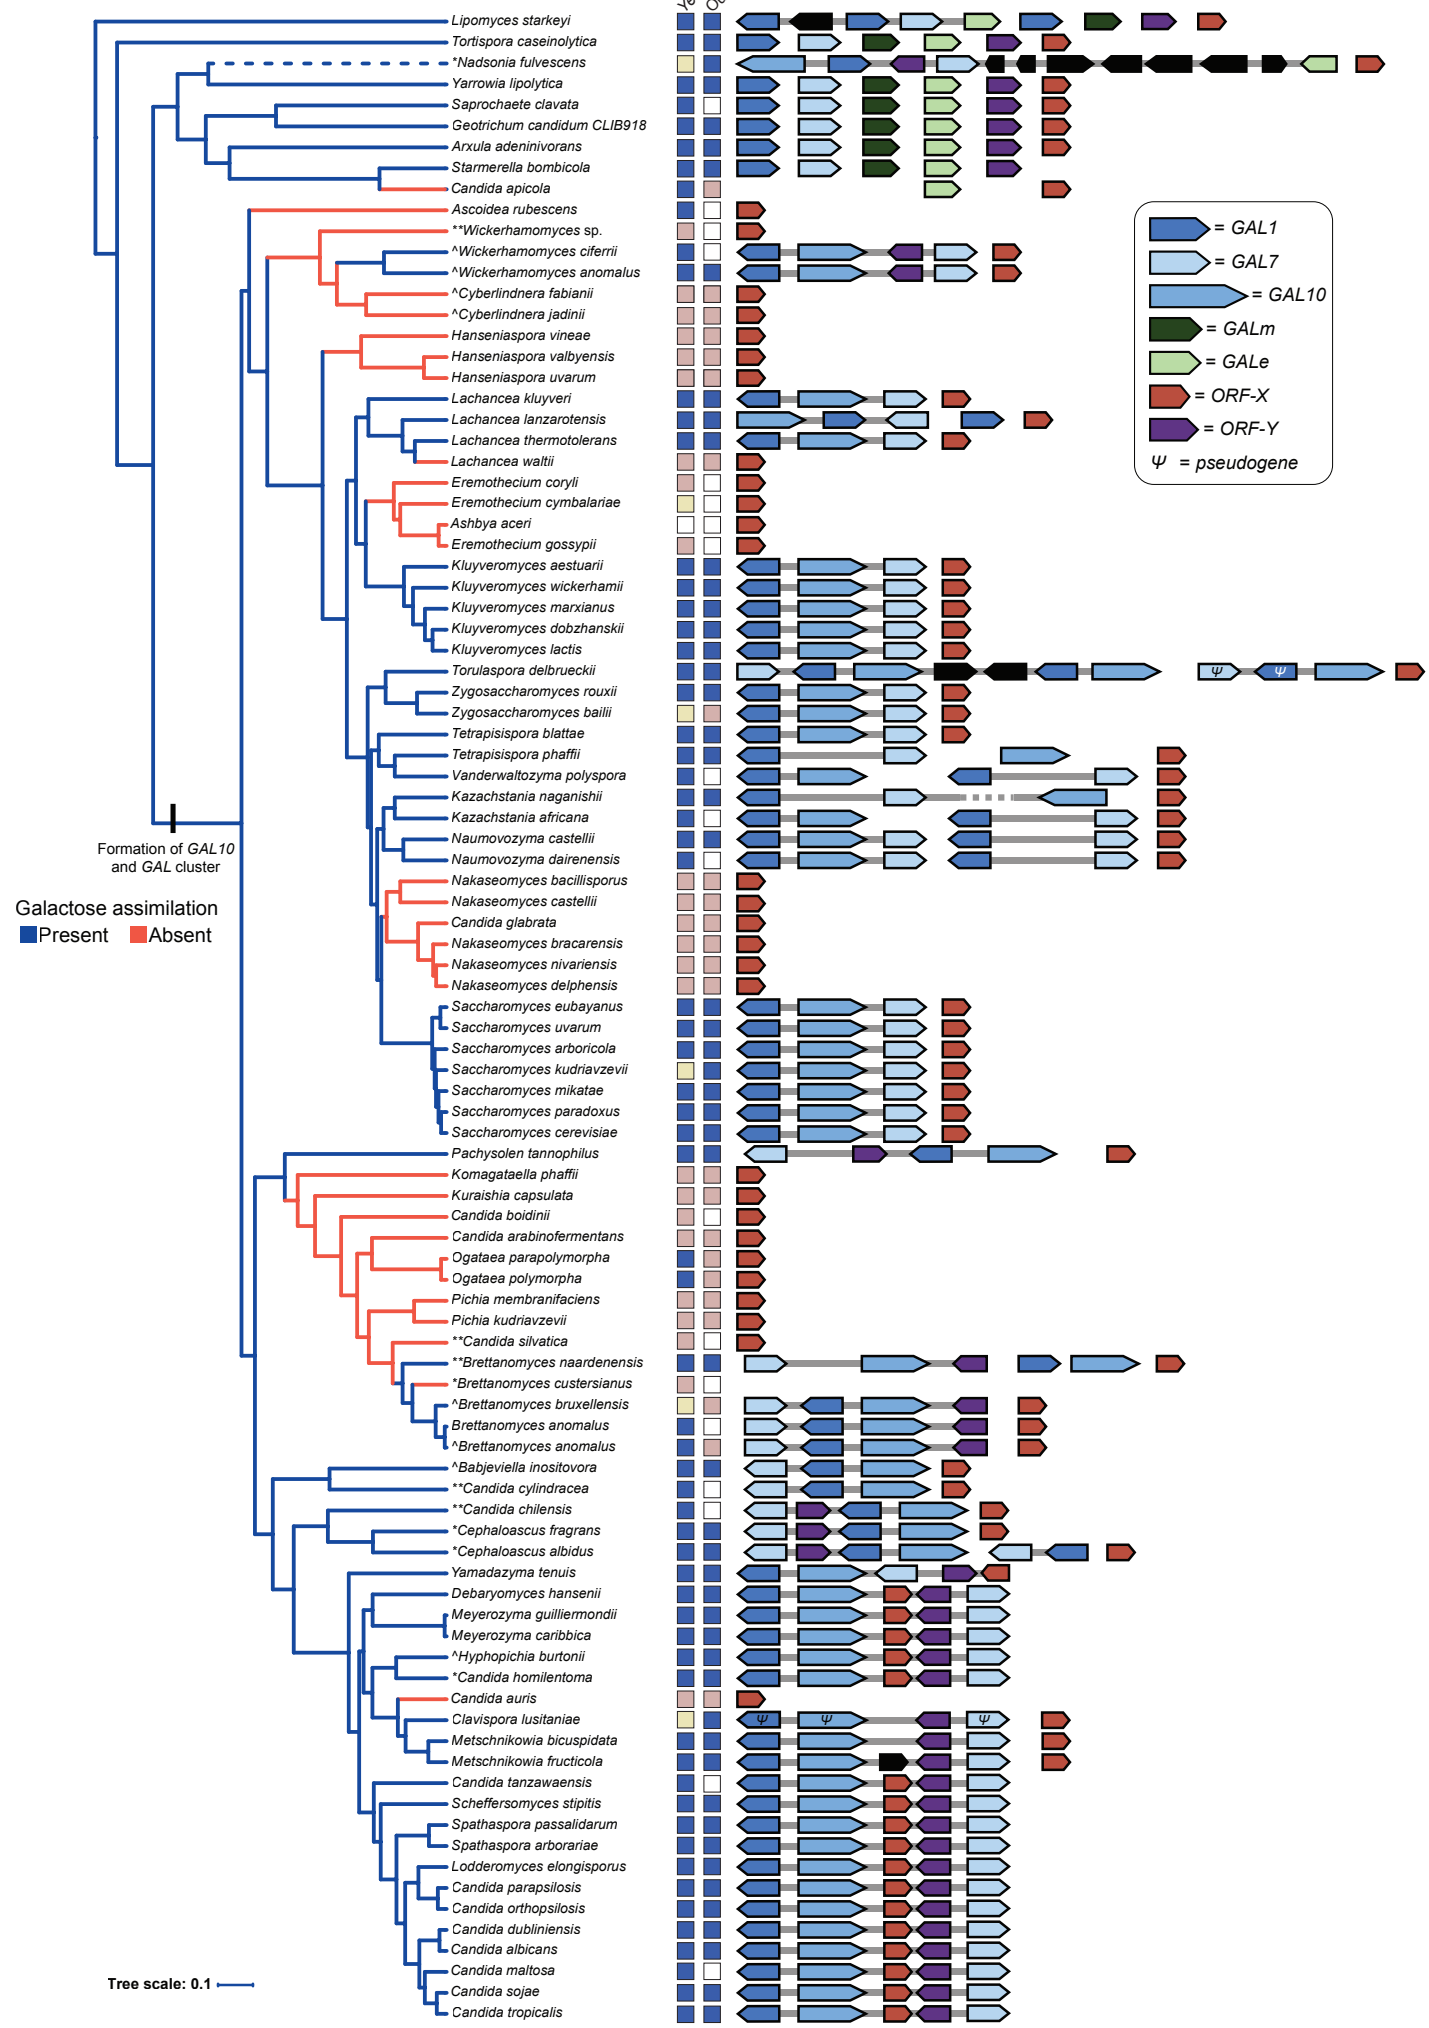

# Supplemental Figure 4

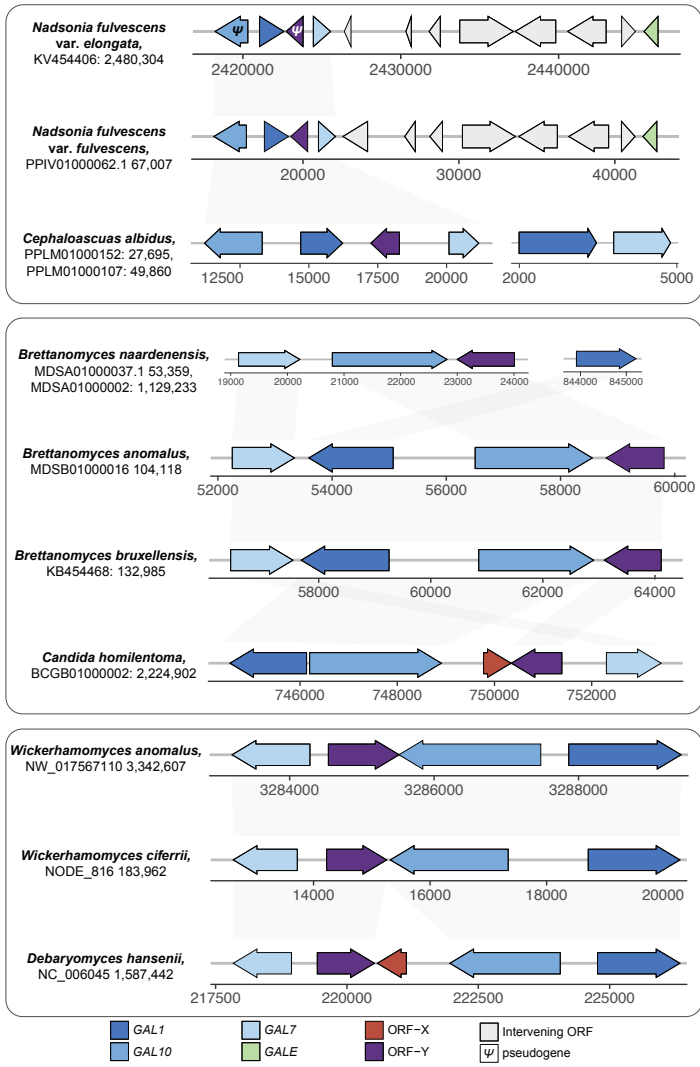

# Supplemental Figure 5

fulvescens 1 ATGCTTTATGTATTAGTTACCGCGGTGCTGGTTATATCGGCTCCCATACAGTGGTTGAG  
elongota 1 ..A..C.....C..C.....

fulvescens 61 CTTTCAACAATGGCTACAGCGTAGTCATTTGGATAACTTGGTCAATTCCTCTACGAC  
elongota 61 ..-.....A...-A.....C...-.....

fulvescens 121 TCAGTAGCAAGACTAGAAAGTCTTGTGTAAGCGGAAGATTCCCCTTTTCAAAAATCGACACT  
elongota 118 .....G..C.....-..GAAG.....T...

fulvescens 181 AGTGACGCCATAGCTCTGGATGCCGTCTTCAAGCAGTACAAGATCGACTCAGTCTTGAC  
elongota 177 .....A.....A..A.....A.....

fulvescens 241 TTTGCCGCTTTAAAGGCCGTTGGCGAATCGACCAAGATTCTCTTGAATACTATGAAAA  
elongota 237 .....TA.AA.T.....A.....C.....

fulvescens 301 AACGTTGGTGGCACTATTGCTTTTATAAAAGTGATGCGACAACAATGTAAAAAATT  
elongota 297 ..T...A.C....C.....A.....T...T.....

fulvescens 361 GTGTTTTCTTCTCGGCTACCGTCTACGGAGATGCTACGGATTCCCCGATATGATACCT  
elongota 357 .....A.....T.....

fulvescens 421 ATTCTGAACACTGTCTACCGCCCTACCAACCCTTATGGCATGACAAAAATTACCATC  
elongota 417 .....T.....C.....T..C..G.....C.....

fulvescens 481 GAGAACATCATTAGAGATCTCTTTCAGTAGCGACAATCATGGAAGTCGGCTATTTTGA  
elongota 477 .....C..C.....

fulvescens 541 TATTTAATCCCATTTGGCGCTCACCCATCTGGGTTAATTGGCGAAGATCCTTTGGGTATC  
elongota 537 .GC.A.....CC..G...T..G....C....C....

fulvescens 601 CCCAACAACTTATTGCCCTTCTTAGCCAGGTTGCCATTGGCCGCCGAGAGAAGATGTGC  
elongota 597 .....T.....A.....A...A..A..

fulvescens 661 ATTTTGGTGATAATTATGATTCTAAAGATGGAAGTCCCATTCGTGATATATACATGTA  
elongota 657 .....G...G.....C.G.....C..C..G

fulvescens 721 GTTGATTTGGCCAAGGCCATATTCGGCTCTTGACCACTTGAACGAATCGCAGCAAGGA  
elongota 717 .....A.A.....C..C..C...A.TT...A..T...A...G

fulvescens 781 TTATGCCGTGAATGGAAGTGGGTACAGGTAACGGTTCACCGTAATCGAAGTCTTCAAC  
elongota 777 .....C.....T.....

fulvescens 841 GCTTCTGTAAGGCCGTAGGTAGAGACTTGGCGTTTGAATCGCCGTCGCCGAGCCGGT  
elongota 837 .....A.....C...TC.A..C.....TA...C.....AT...

fulvescens 901 GATGTACTAAACCTTACCGCAGACGCTAGAAGAGCGAACAAAGAGTTGAAATGGCATGCG  
elongota 897 A.C.....G..T.....A.....TCA.A

fulvescens 961 GAATTATCCATTGATGATGCCCTGTAAGGATTTGTGGAATGGACAACGATAATCCTATG  
elongota 957 .....C...C.....A.....GGA.....CG.....

fulvescens 1021 GGGTTTCAAATTGAAAGATACAATGGAAGCACTTCAATAATGAATCCCATTTTGAAGAT  
elongota 1017 .....C.....A.-...G.....G..T.....

fulvescens 1081 AGATTACATACTTTAATTTCCAGTGACGGAAGTTTCAATTCTCCGTTAGCAATCTGGGA  
elongota 1076 .....T.....G.....T..T.G...G.....T...

fulvescens 1141 GCTAGTGTGTGGATGCGTCTCTGGACGGTGTAAACTGTGCTGTGGTTTCGATAATGAA  
elongota 1136 .....GT.....G..A...A.A...T.....

fulvescens 1201 GAAGGTTATTTGAGAAAGGATAACCCTTTCTTTGGCGCCACCATTGGCAGGGTTGCCAAT  
elongota 1196 .....C..A.....CA.....G.....AAA..-A...

fulvescens 1261 AGAGTCAAGGGTGTAAATTAACGTGTTACGGCTCTACTTATCAGCTACCCCTAAATGAA  
elongota 1255 .....C.....C..A.....T.....G

fulvescens 1321 AATGGTGTCAATACTATTTCATGGTGGGTATCCGGATTTCGACAAAAACTTTTCTGGGT  
elongota 1315 ..A.....C.....A.....G.....G

fulvescens 1381 CCAATTGTTGTAAGAATCTCAAACCTGATTTAAACCAATGGAAATTTTACTTGTGAC  
elongota 1375 T.C.....CT.....GC.....AT...T.....A.....

fulvescens 1441 AAAGATGGTGAACAACCTCCAGGTGATTTAGAGGTCAAGGTAATCTACACTCTTCAA  
elongota 1435 G.G..G.....T..T.....C...TC.....T...T.....

fulvescens 1501 AAGTTCGAAAAGGTGGCGCCATCGGCTTGGAAATACGAAGCTAAATTATGCTGATACT  
elongota 1495 ..A..T.....T..T.A.....A.....C...A.....

fulvescens 1561 AATGTCCATGAAACTGCCGTTTCCATTACCAATCATACTATTGGAACATCGGAATAAC  
elongota 1555 ..A...CC.....T.....T..T.....T.....

fulvescens 1621 TCTACTATAGAGGGTACTGAAATCGCTTAAATTACCGATAAACATTTGCAGGTTGGAGCT  
elongota 1615 .....A.C...-GG...C..T.....A.....A...ATG...

fulvescens 1681 GATTTATTGCCGACCAGGGATATAATCATCAATAATAATATCGCCAGGATTGAATCCGGT  
elongota 1672 .....GC.TT.....-C.T.....G.....CT.....A.....

fulvescens 1741 AAATTTACTACTTTGAATCAAAAATCTCCTGAATTTGACTATTGTTTTACTGTTGCGGAT  
elongota 1728 .....C.....TC...GG.....C...T...C..C...A.....

fulvescens 1801 CCC--AGAATTTCAAATCGATACCAGGTCCAAGAATATGCAAGTTATCGCTAAGGCT  
elongota 1788 ..A--..A..A.....CC.....A.....TC.....

fulvescens 1860 TACCATCTGAAACCAAGATCCGCTTTATAACCTCTACAACCTGAACCGTCATTCCAATT  
elongota 1848 .....G.....A.....T.....C.....T..C..

fulvescens 1920 TACTGTTGACCATATTAATGTTGAAGGTTTATTTGGAAAGCGTGTGGATTTGCTTA  
elongota 1908 .....A.....C.....C.....A.C.....

fulvescens 1980 GAGGCTGCTAGGTTTATTGATTCTGTAAACCACGAAGATTGGCGGCAGGTATGGTATTA  
elongota 1968 .....C.....A.....T.....C.....A.....C.....

fulvescens 2040 AAGAATGGGAAGTCTACGGTTCAAAGACCCTATACAGTTTTCAGCACTGAATAG  
elongota 2028 .....G.....GT..T..G..G..C...A...A.....

Supplemental Figure 6

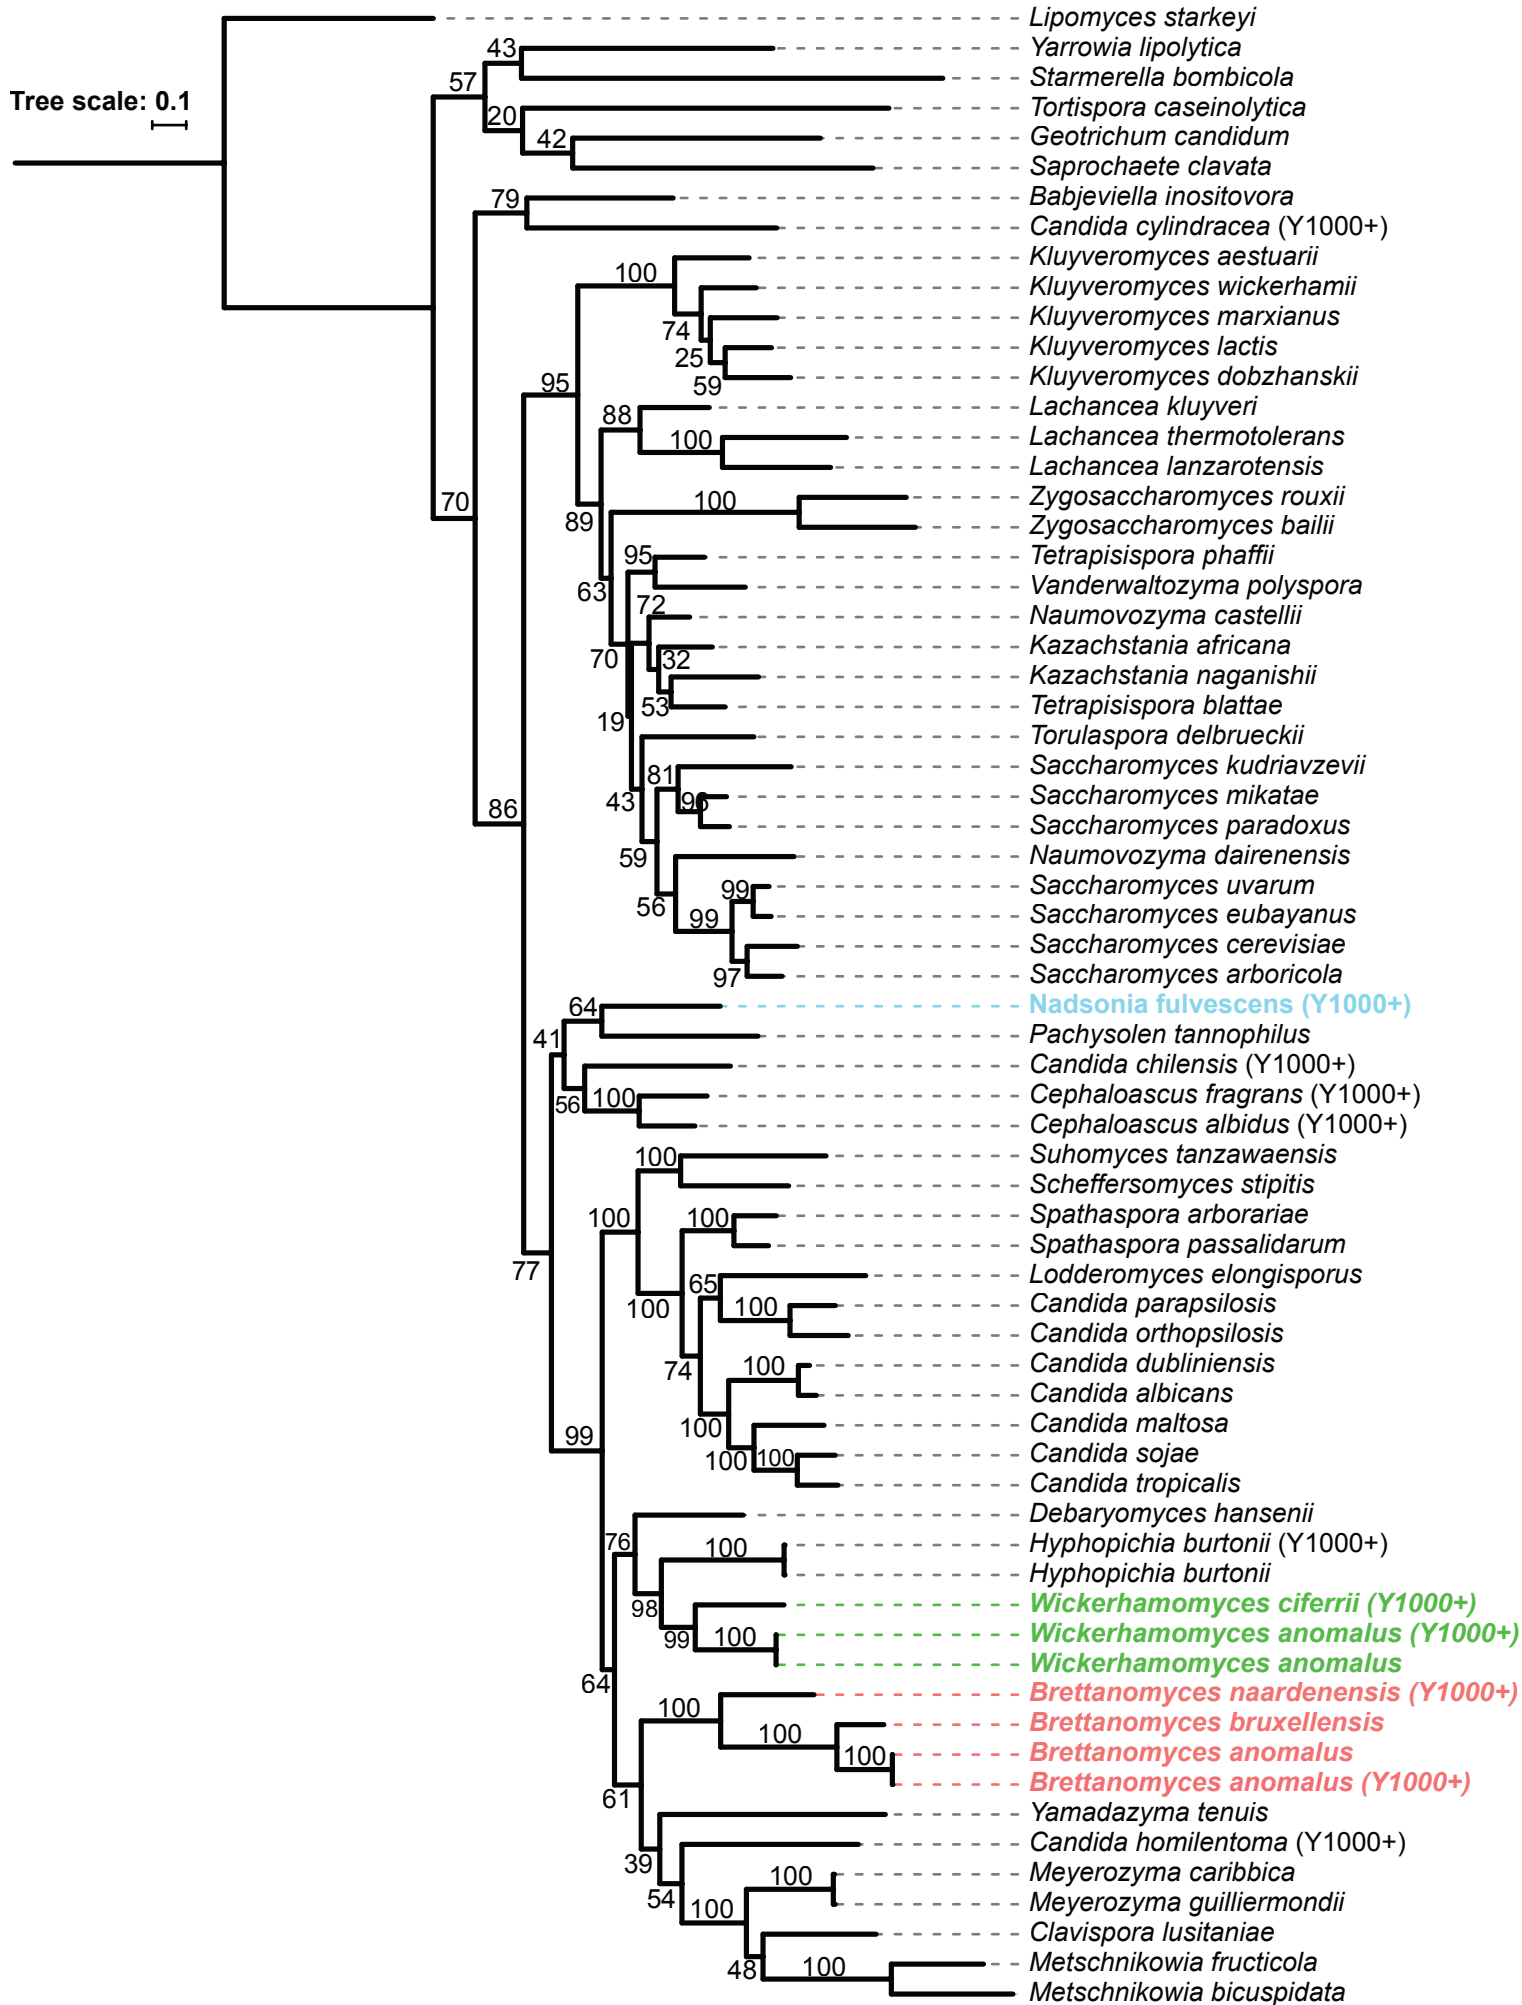

Supplemental Figure 7

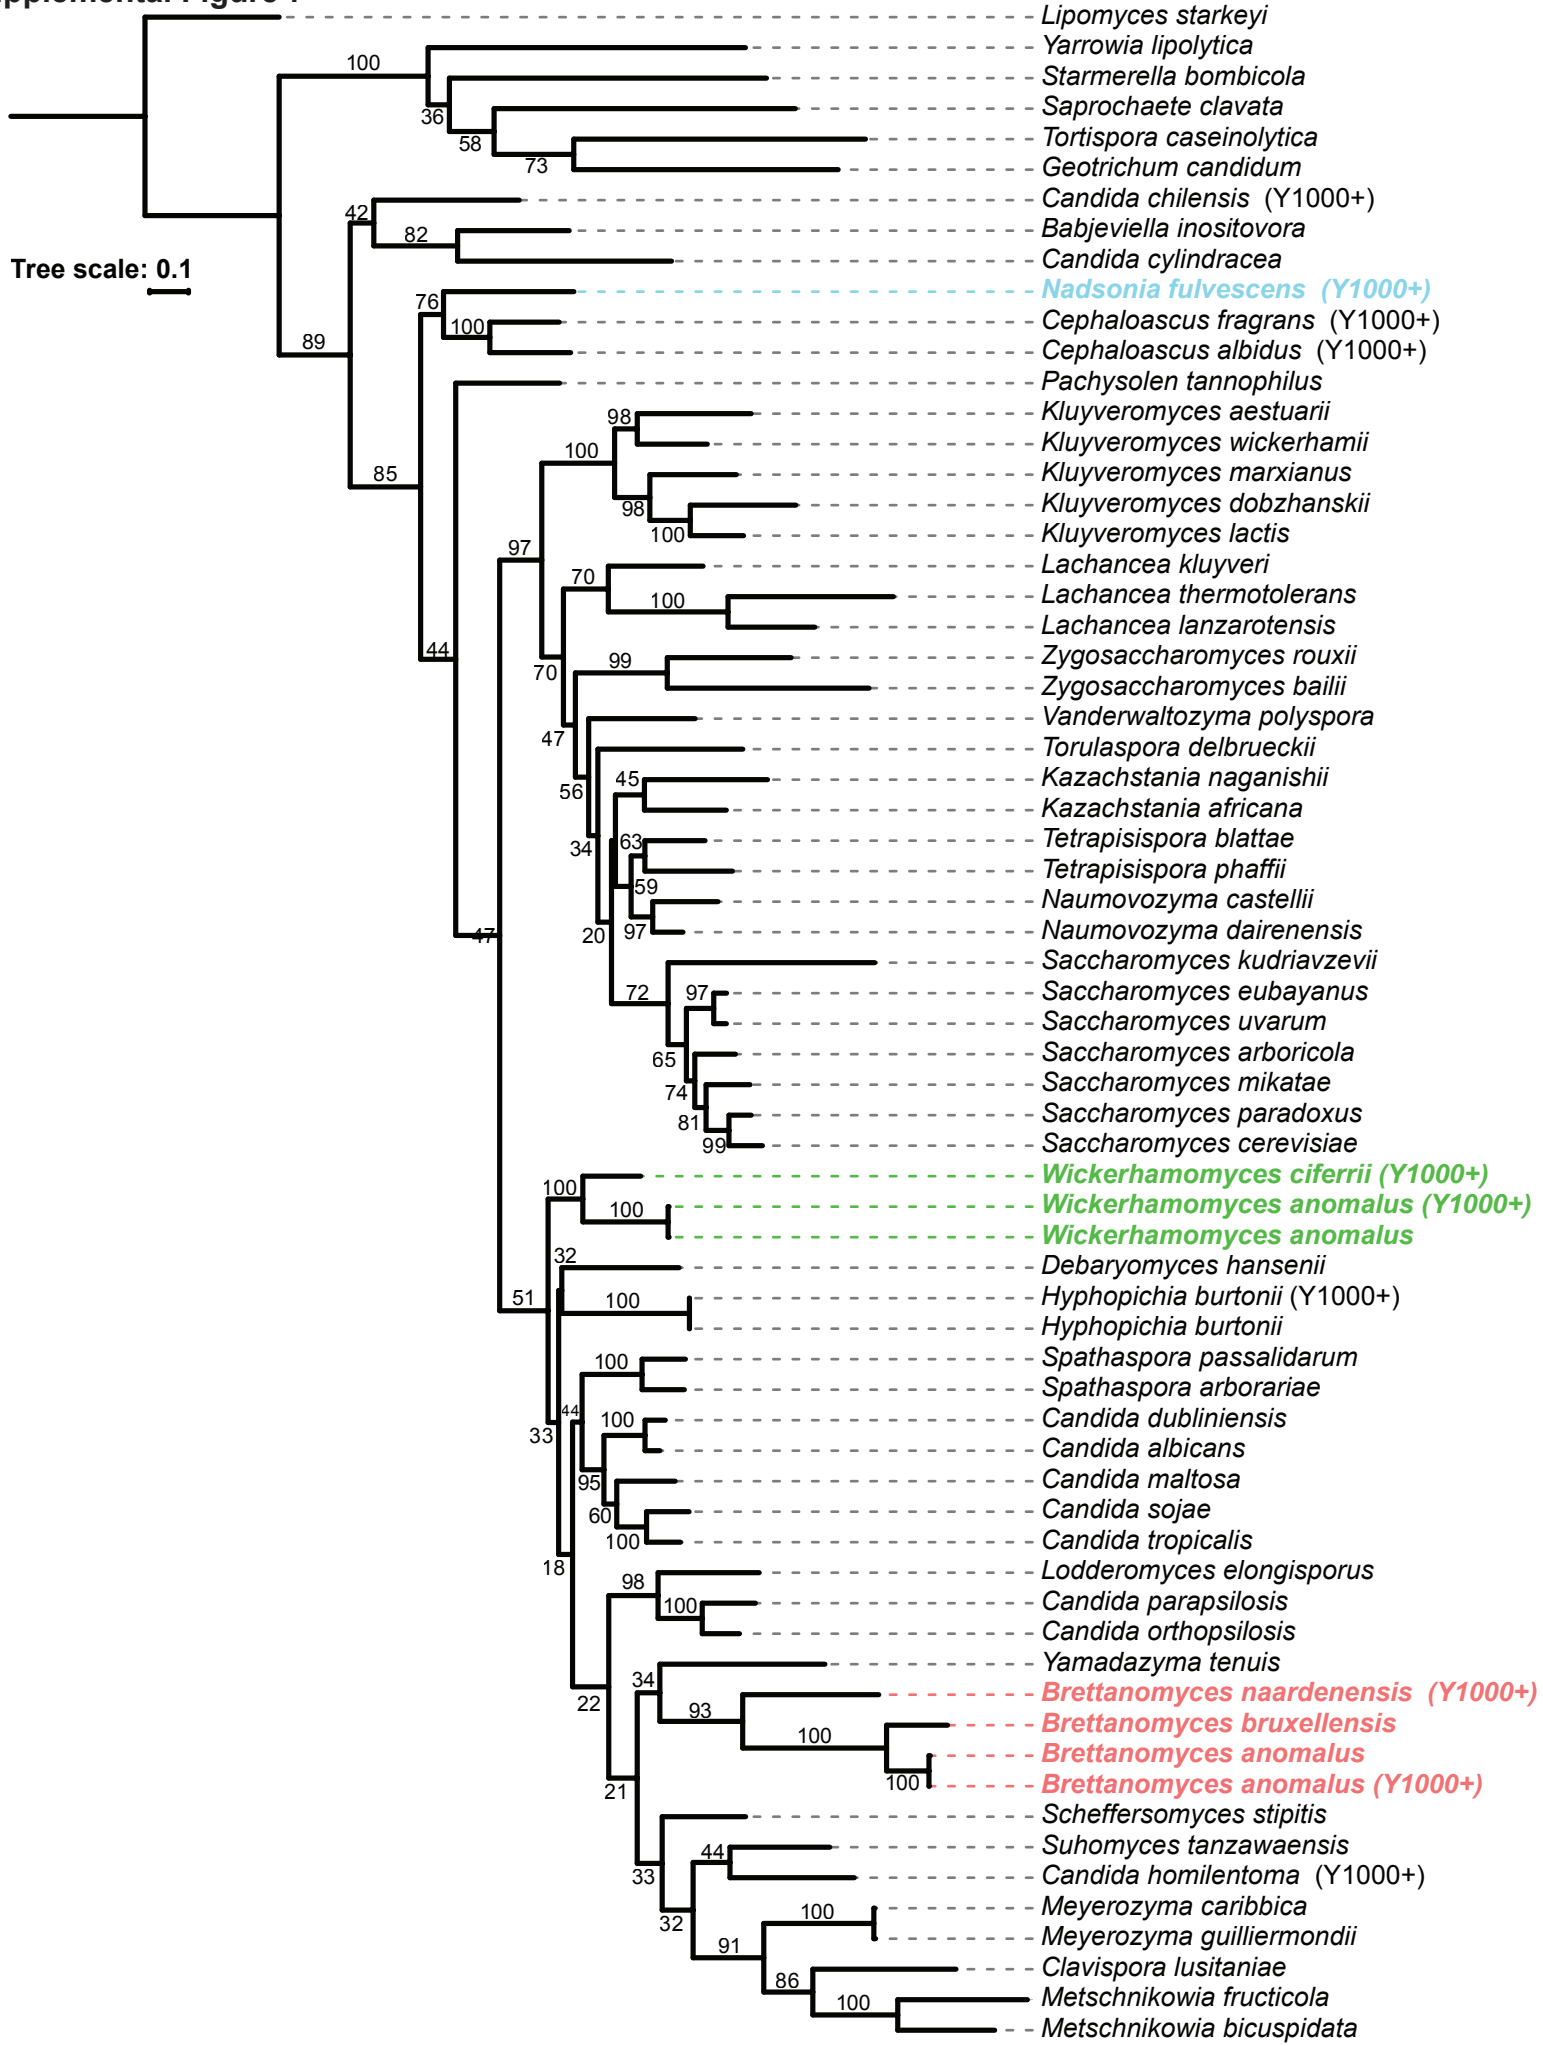

Supplemental Figure 8

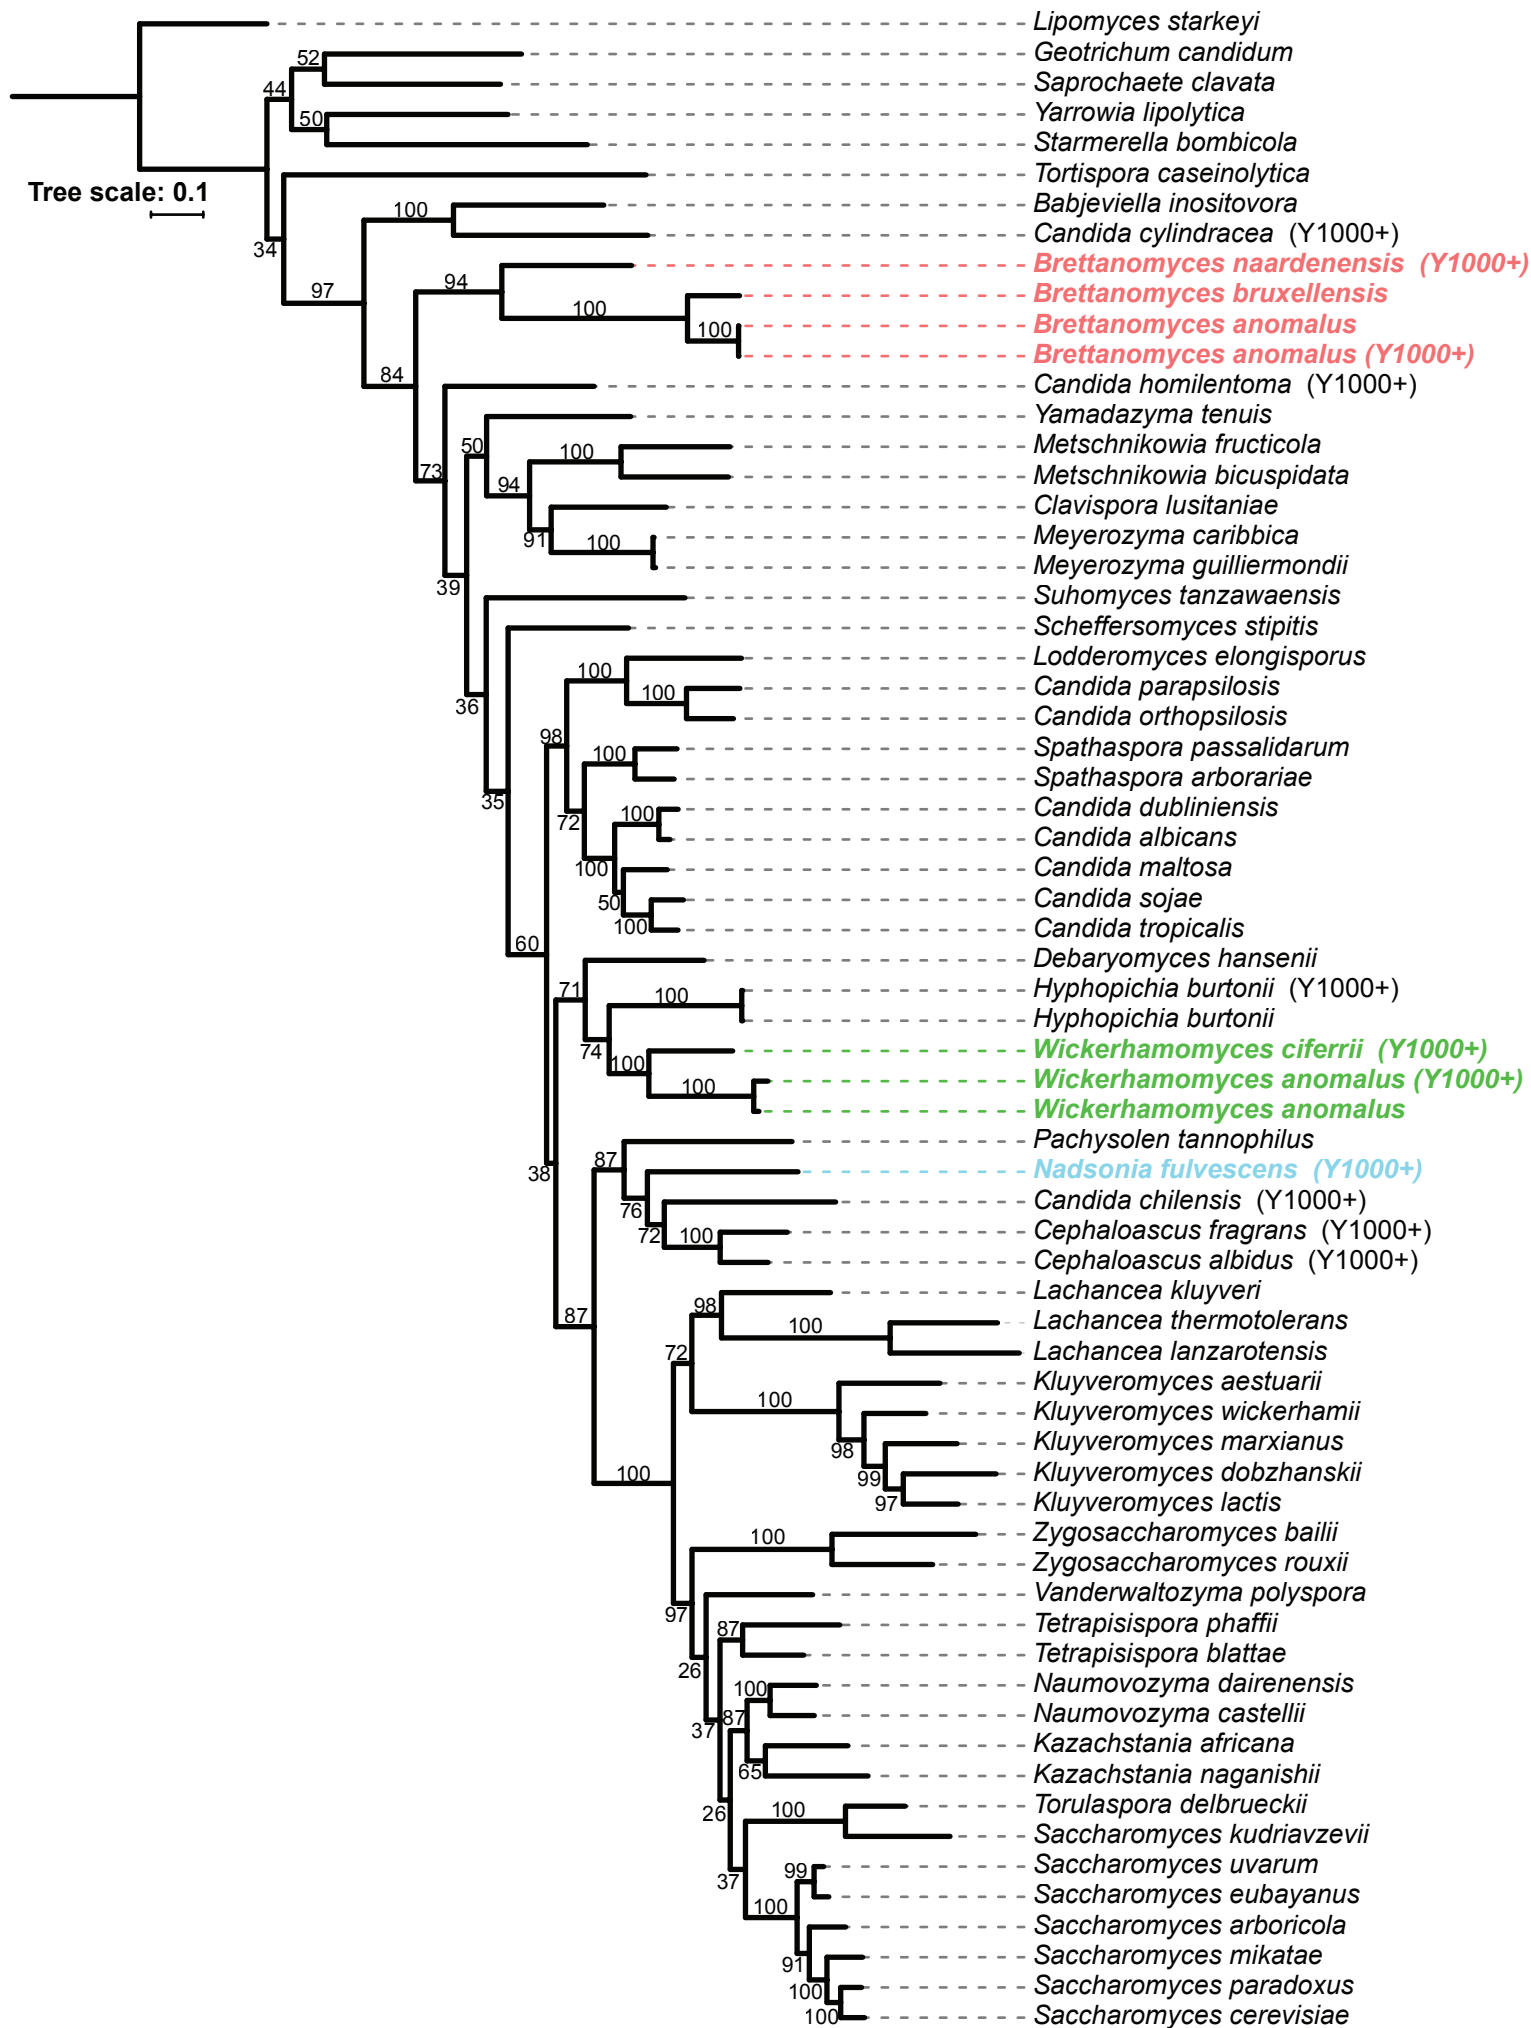



Supplemental Figure 9

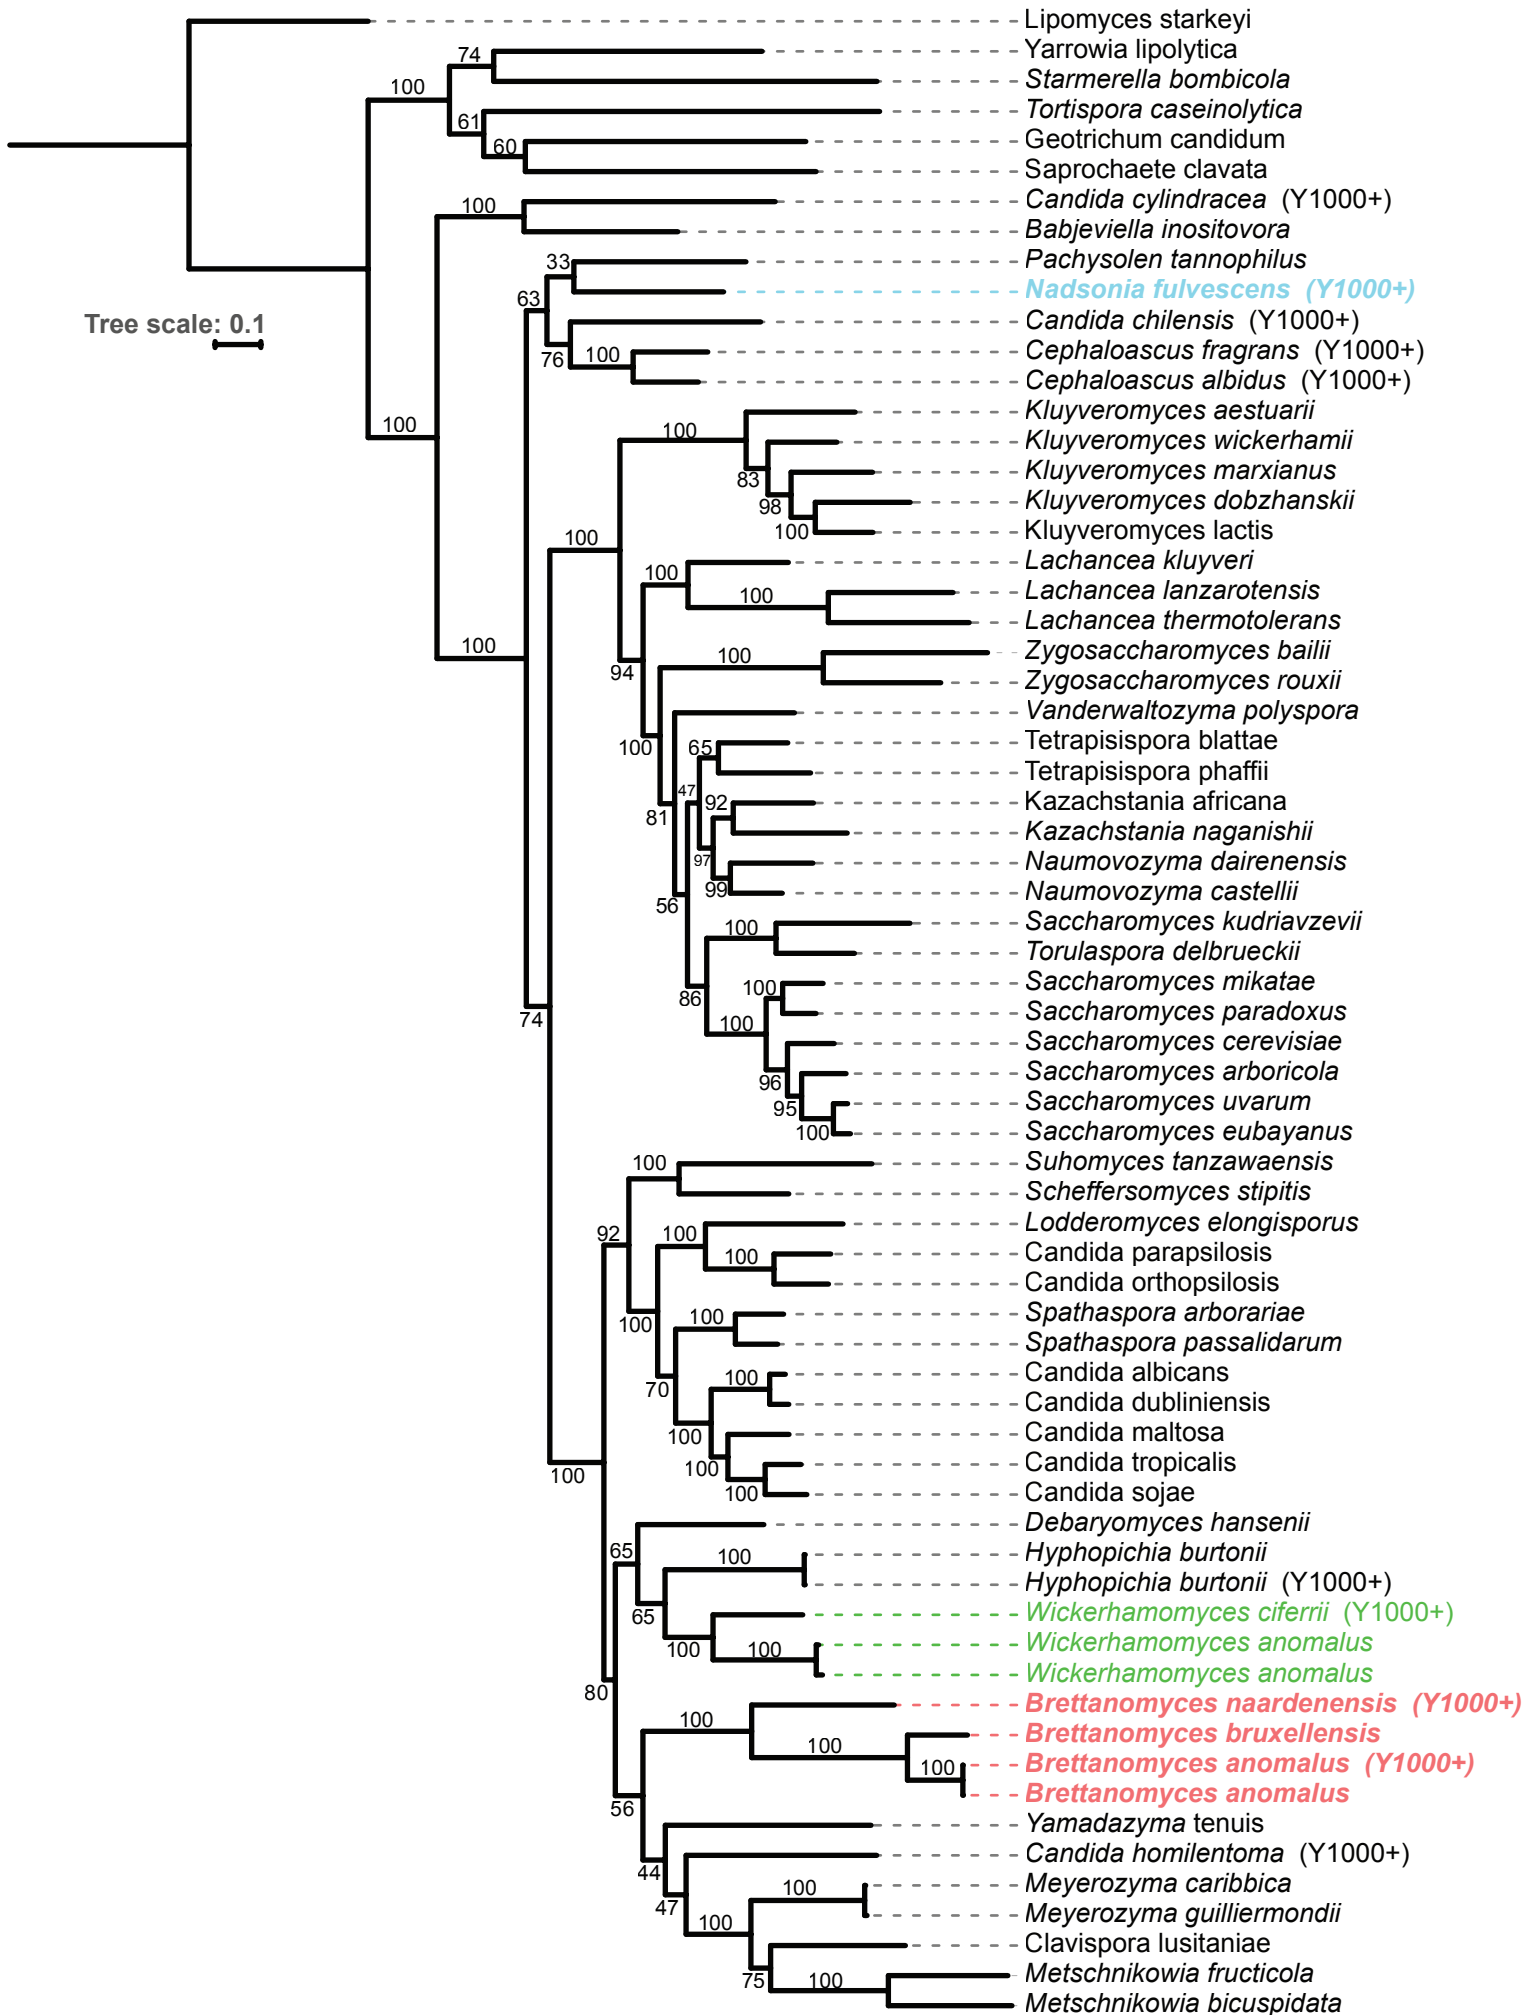

Supplemental Figure 10

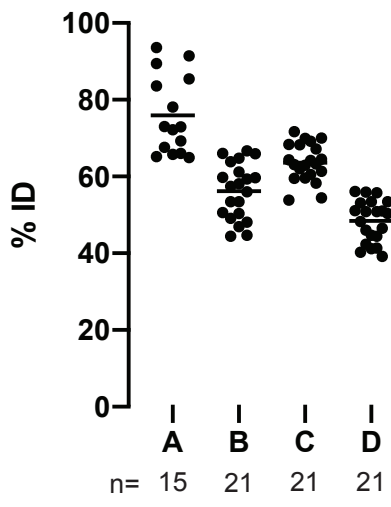

Supplement: Supplementary file [file media-3.pdf]
